# Supplementary material for: Temperature-resolved nanoscale hydration of a layered manganese oxide
Source: Royal Society of Chemistry journal article supplement (doi:10.1039/d3cp01209c), 2023-01-01
Supplement: d3cp01209c1.pdf [file d3cp01209c1.pdf]

## SUPPLEMENTARY INFORMATION

### Temperature-resolved nanoscale hydration of a layered manganese oxide

N. Tan Luong, Hanna Oderstad, Michael Holmboe, Jean-François Boily\*

Department of Chemistry, Umeå University, SE-901 87 Umeå, Sweden

\*corresponding author: jean-francois.boily@umu.se

#### Table of Content

|              |   |
|--------------|---|
| FIG. S1..... | 2 |
| FIG. S2..... | 2 |
| FIG. S3..... | 3 |
| FIG. S4..... | 4 |
| FIG. S5..... | 5 |
| FIG. S6..... | 5 |
| FIG. S7..... | 6 |

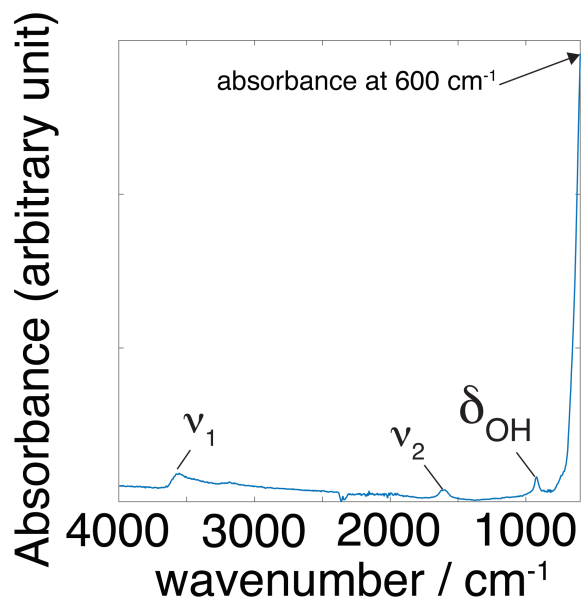

**Fig. S1.** FTIR spectrum of birnessite dried under  $N_2(g)$  for 24 h, also showing residual water ( $\nu_1$ ,  $\nu_2$ ). Absorbance values of dry at  $600\text{ cm}^{-1}$  prior exposure to water were used to normalize all spectra.

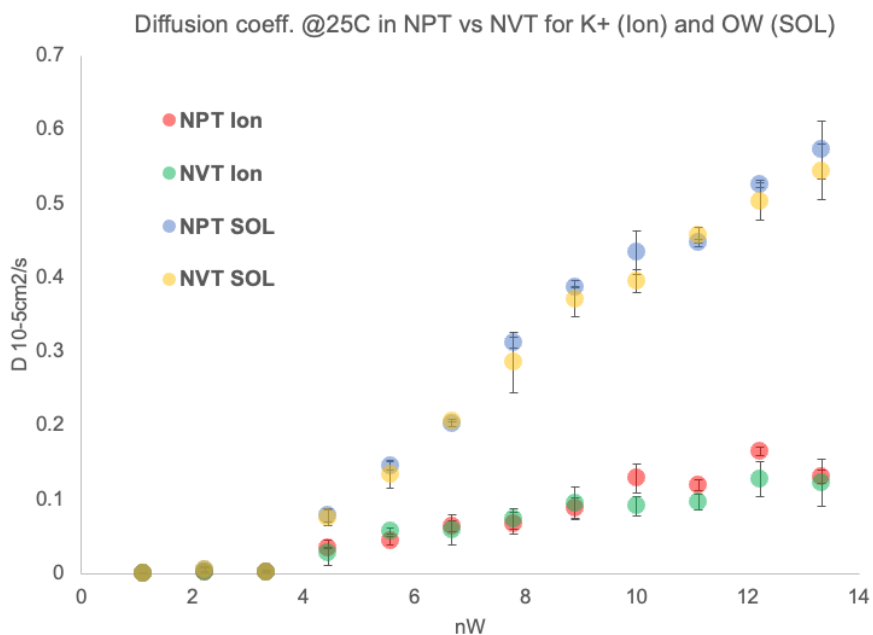

**Fig. S2** Comparison of  $K^+$  (Ion) and water (SOL) diffusion coefficients obtained by simulations run under isobaric-isothermal (NPT) and canonical (NVT) ensembles.

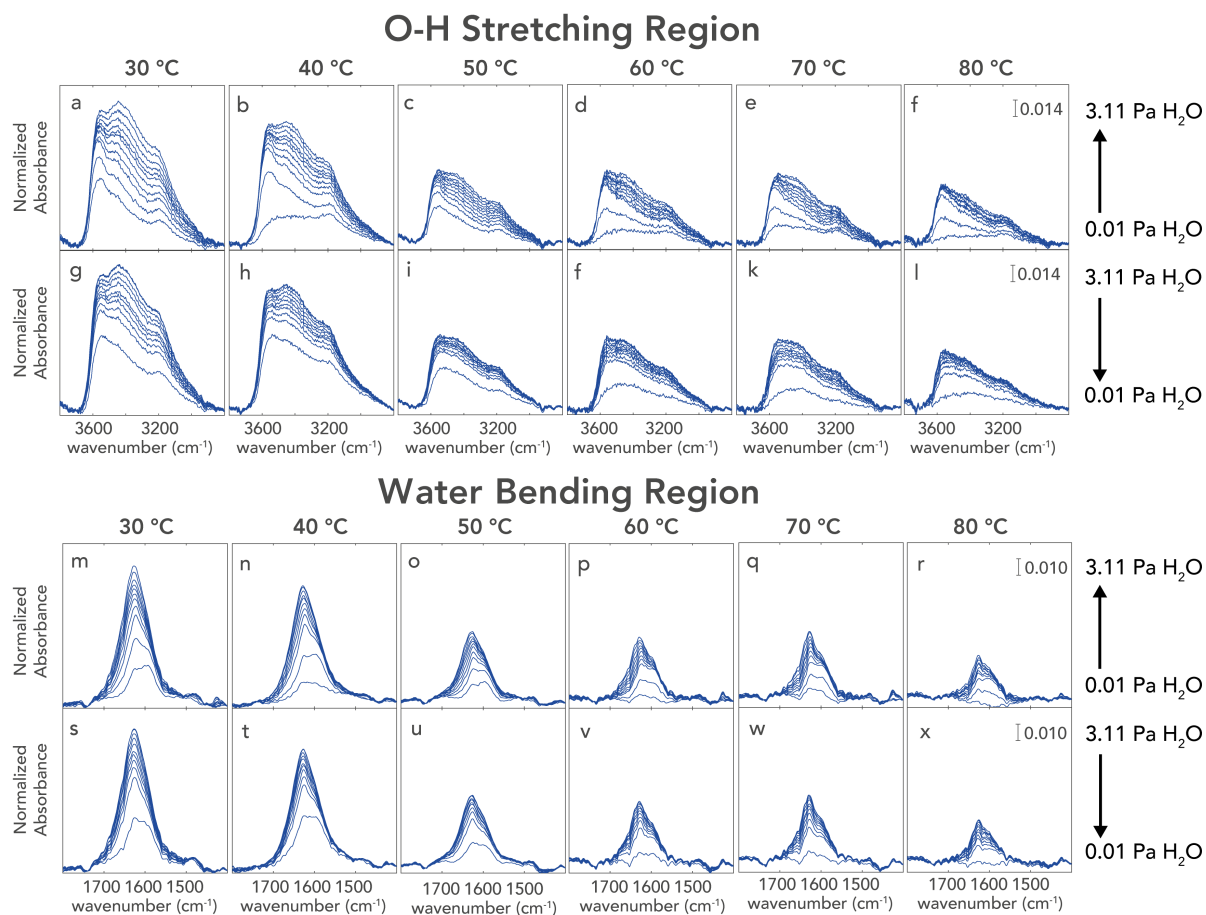

**Fig. S3.** FTIR spectra of birnessite exposed to a 500 mL/min flow flow 0-3.11 kPa H<sub>2</sub>O in N<sub>2</sub>(g) (total pressure of 101 kPa) during (a-f, m-r) adsorption (Fig. 2 of main text) and (g-l, s-x) desorption legs at (a, g, m, s) 30, (b, h, n, t) 40, (c, i, o, u) 50, (d, f, p, v) 60, (e, k, q, w) 70, and (f, l, r, x) 80 °C. All absorbances were normalised for the quantity of MnO<sub>2</sub> based on the intensity of the Mn-O stretching band at 600 cm<sup>-1</sup> (Fig. S1).



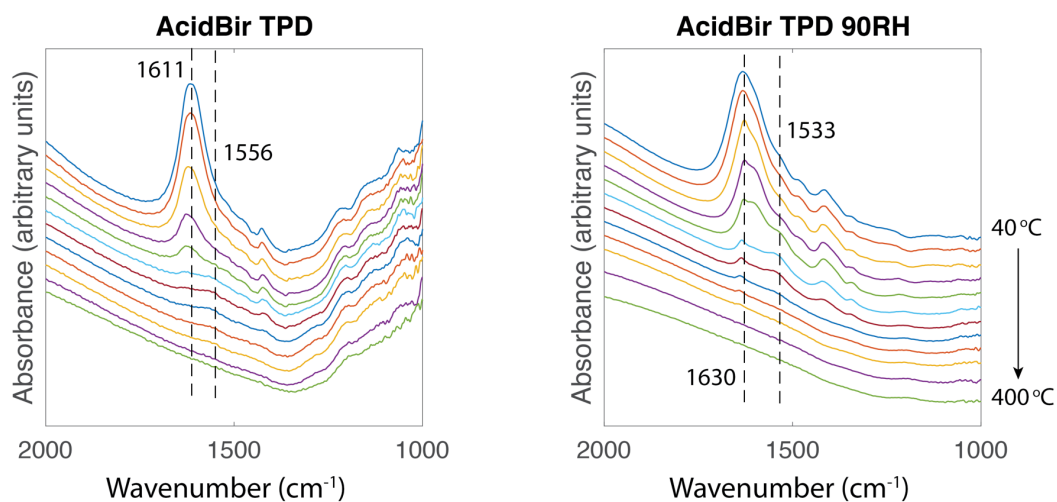

**Fig. S5.** Temperature programmed desorption (TPD) experiment of acid birnessite heated up to 400 °C at a gradient of 10 °C/min (left) under vacuum and (right) under a flow of 500 mL/min N<sub>2</sub>(g) with 90% RH (3.11 kPa H<sub>2</sub>O).

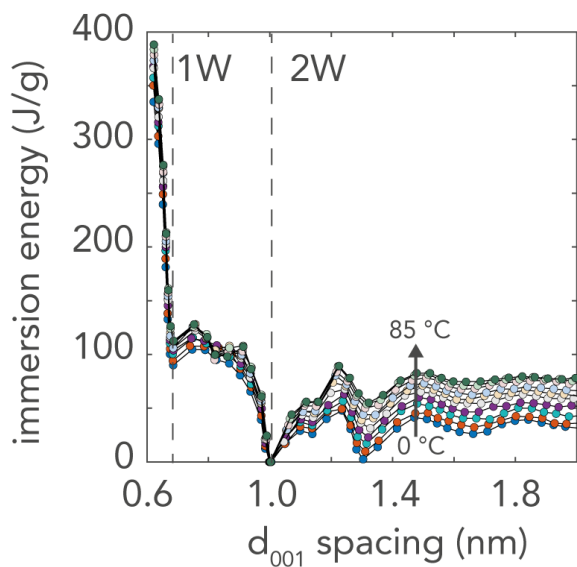

**Fig. S6.** Predicted immersion energy profiles versus d<sub>001</sub>-spacing, showing the 1W state at 1.33 H<sub>2</sub>O/UC (5.33 H<sub>2</sub>O/K<sup>+</sup>; d<sub>001</sub>-spacing=0.685 nm) and the 2W state at 3.33 H<sub>2</sub>O/UC (13.33 H<sub>2</sub>O/K<sup>+</sup>; d<sub>001</sub>-spacing=1.00 nm).

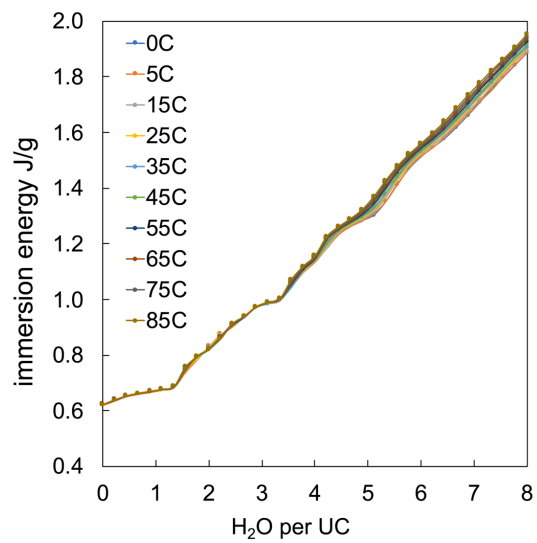

**Fig. S7.** Predicted immersion energy profiles versus water per unit cell (UC).
